# Supplementary material for: The transcriptional landscape of mouse beta cells compared to human beta cells reveals notable species differences in long non-coding RNA and protein-coding gene expression
Source: PubMed Central journal article supplement (PMC4124169; doi:10.1186/1471-2164-15-620), 2014-07-22
Supplement: 12864_2014_6324_MOESM1_ESM.pdf [file 12864_2014_6324_MOESM1_ESM.pdf]

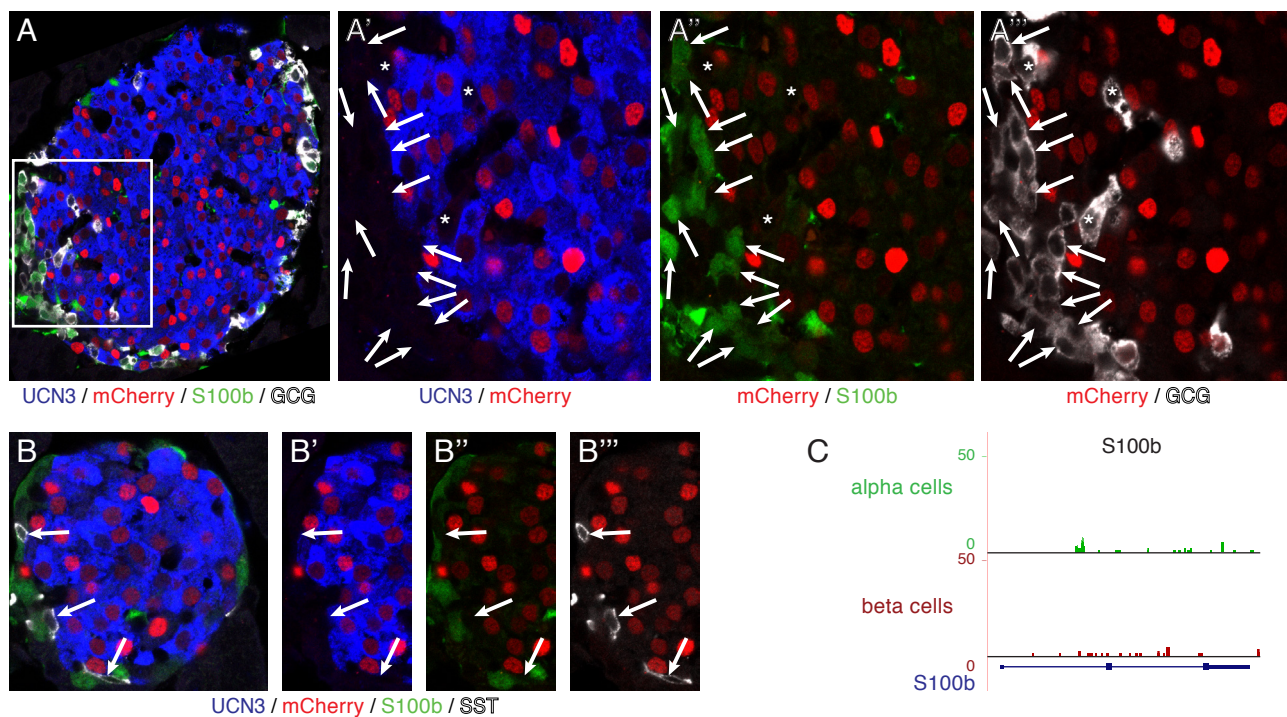

**Additional data file 1:** Validation of the S100b-eGFP mouse. **(A)** The S100b-eGFP reporter mouse expresses eGFP in alpha cells (arrows). **(B)** Beta cells, marked by co-expression of UCN3 and mCherry, and delta cells (arrows) are GFP-negative. **(C)** S100b transcript is virtually undetectable, suggesting that eGFP expression is a useful artifact.
