# Supplementary material for: The transcriptional landscape of mouse beta cells compared to human beta cells reveals notable species differences in long non-coding RNA and protein-coding gene expression
Source: PubMed Central journal article supplement (PMC4124169; doi:10.1186/1471-2164-15-620), 2014-07-22
Supplement: 12864_2014_6324_MOESM7_ESM.pdf [file 12864_2014_6324_MOESM7_ESM.pdf]

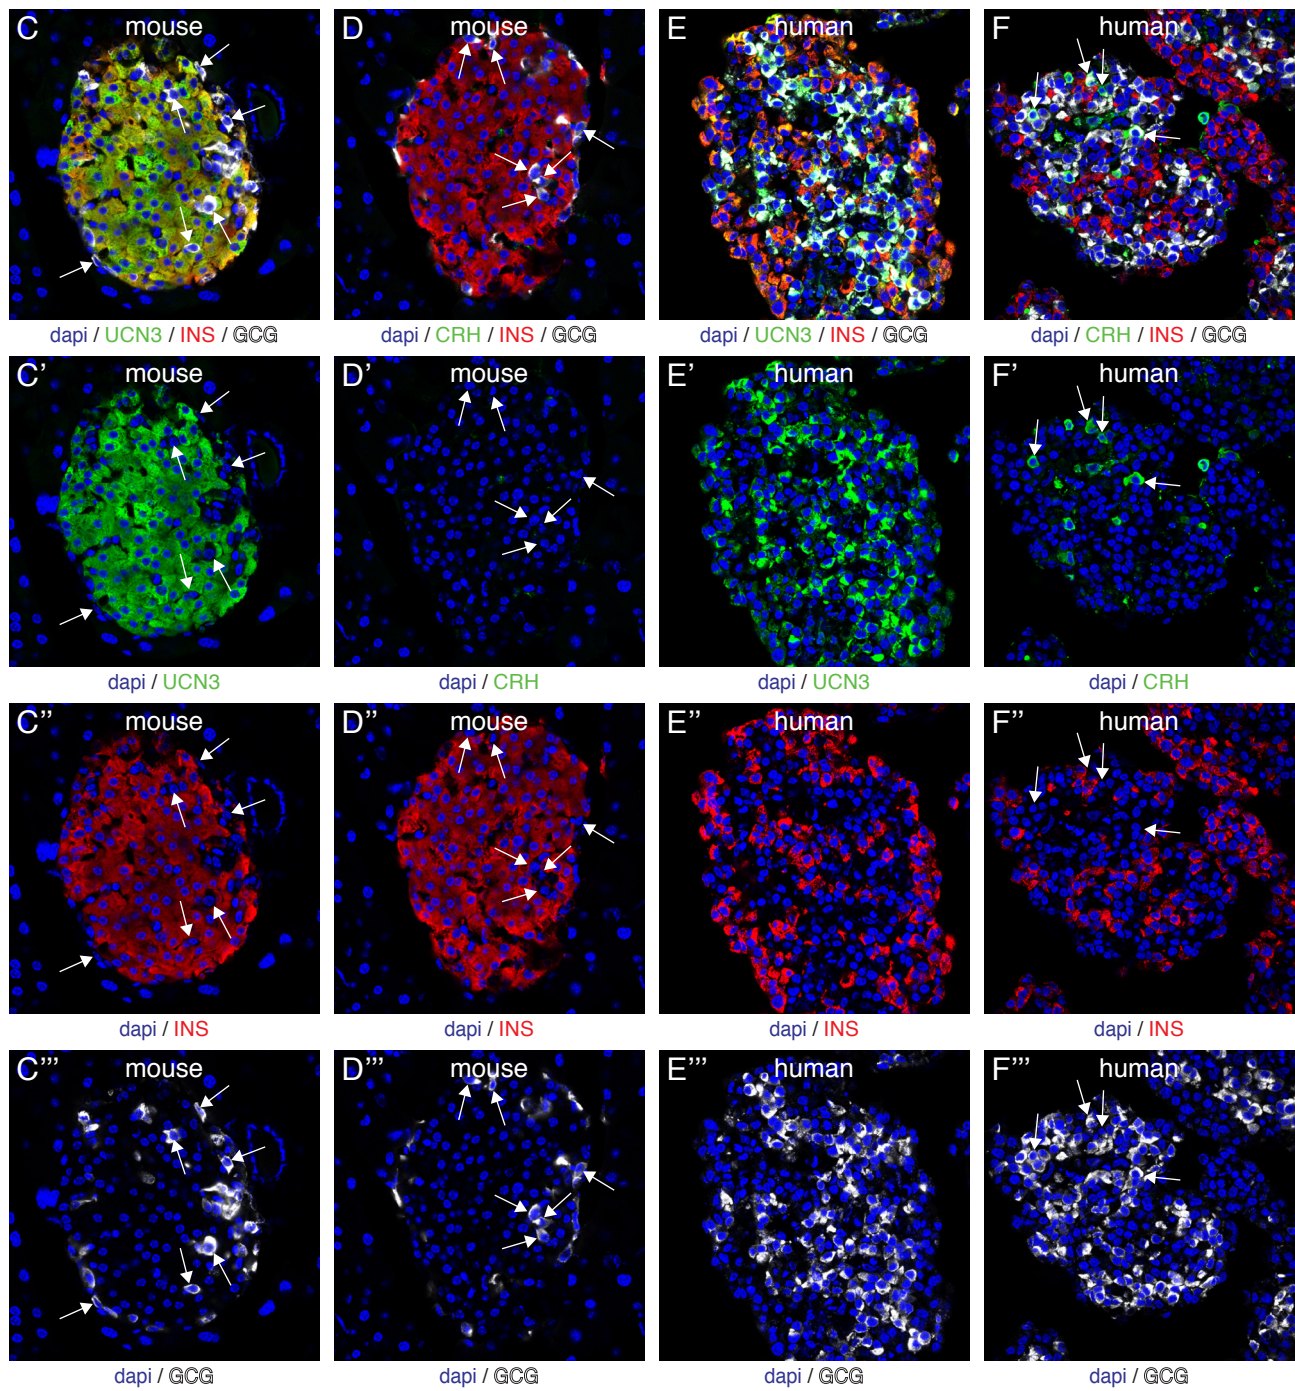

**Additional data file 7:** Validation of known differences in gene expression between mouse and human alpha and beta cells. Single channel panels of the immunofluorescence in Figure 5.
