# Supplementary material for: The transcriptional landscape of mouse beta cells compared to human beta cells reveals notable species differences in long non-coding RNA and protein-coding gene expression
Source: PubMed Central journal article supplement (PMC4124169; doi:10.1186/1471-2164-15-620), 2014-07-22
Supplement: 12864_2014_6324_MOESM10_ESM.pdf [file 12864_2014_6324_MOESM10_ESM.pdf]

side-by-side comparison of human and mouse IAPP standard curve

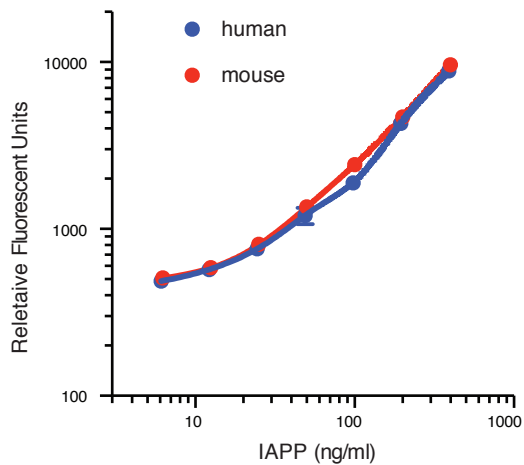

**Additional data file 10:** Standard curves for human and mouse IAPP demonstrate that IAPP from both is detected equally by the human IAPP elisa. Standard bars reflect standard errors across duplicates.
